# Supplementary material for: Genomotyping of Coxiella burnetii Using Microarrays Reveals a Conserved Genomotype for Hard Tick Isolates
Source: PubMed Central journal article supplement (PMC3201959; doi:10.1371/journal.pone.0025781), 2011-10-25

Present

Deleted

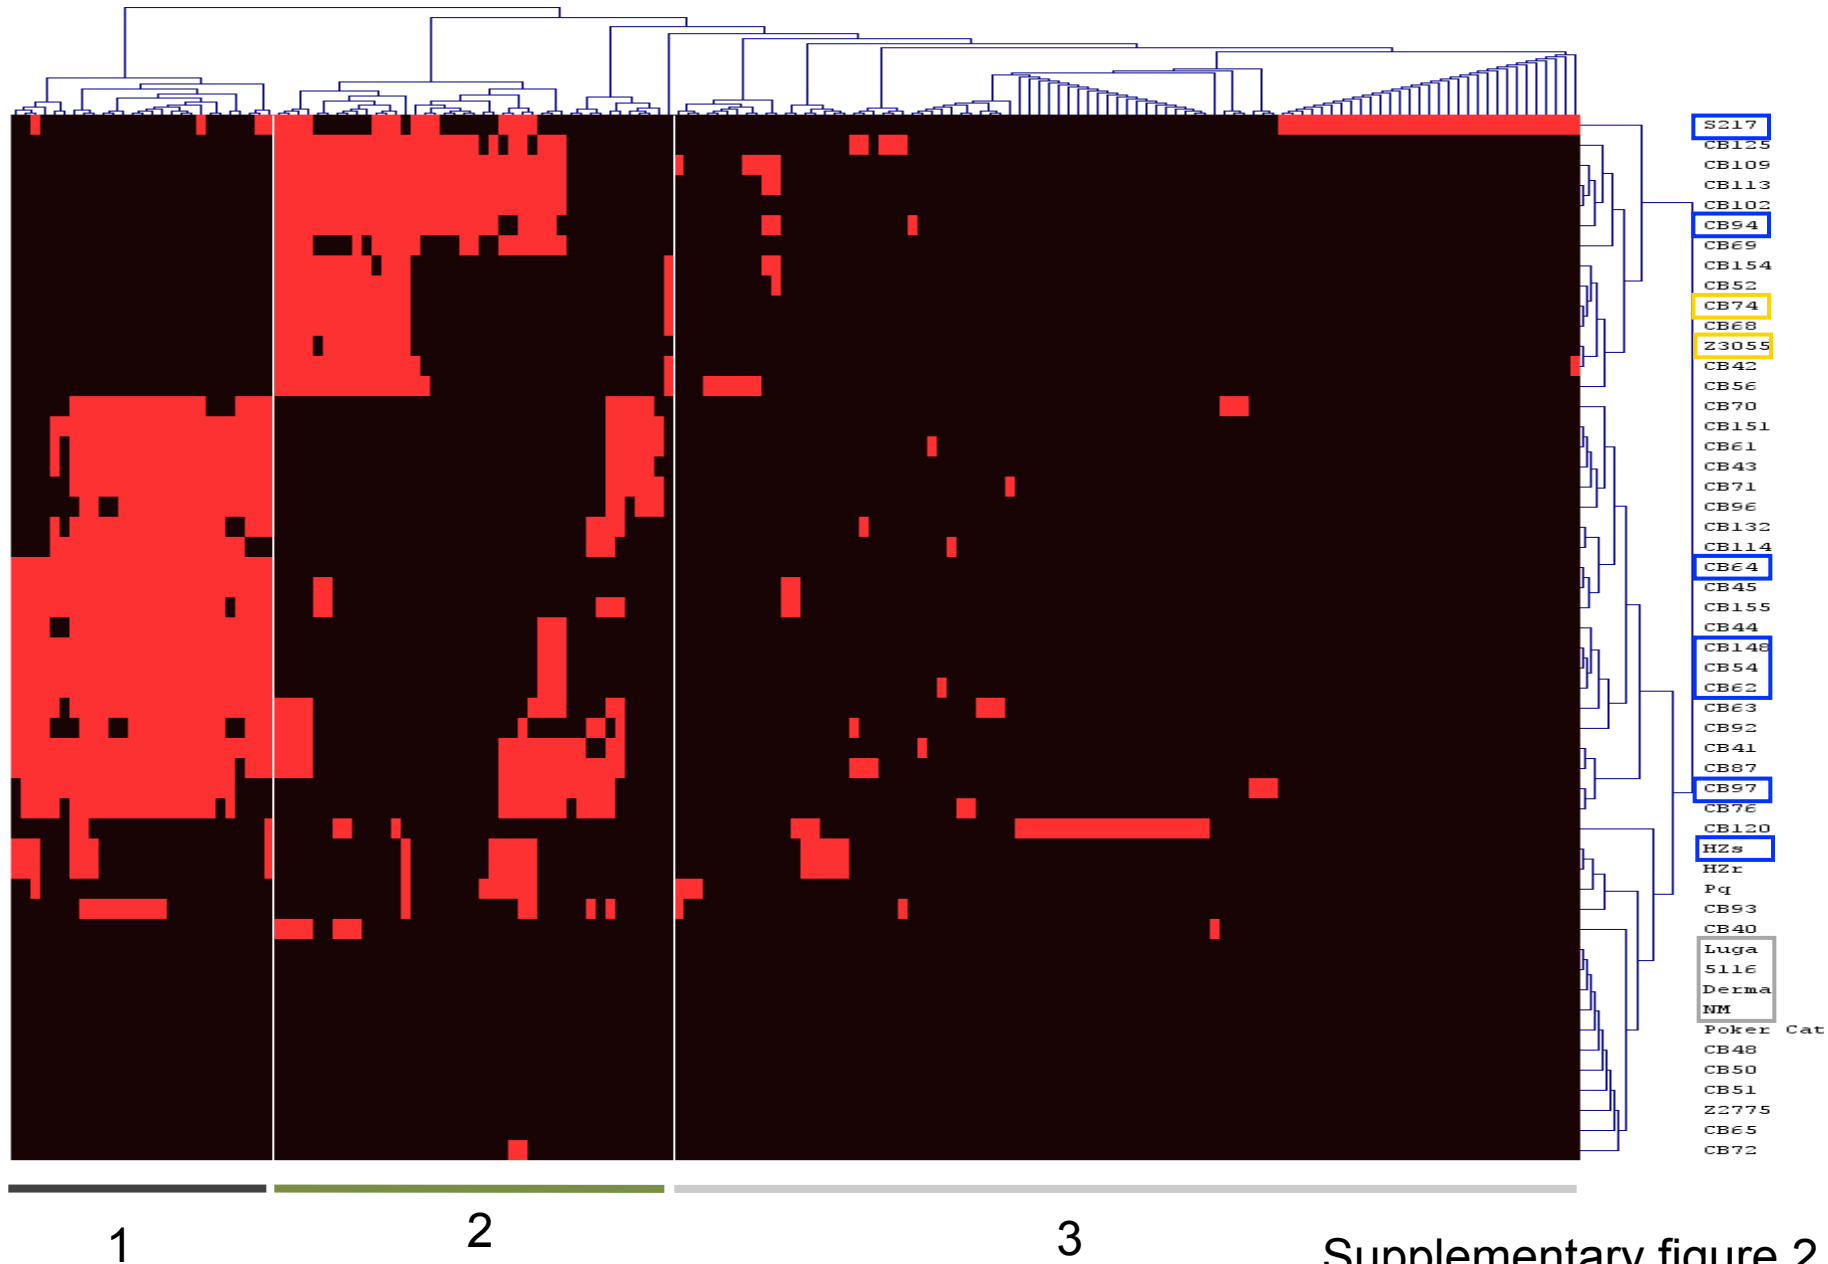

Supplement: pone.0025781.s002.pdf [file pone.0025781.s002.pdf]
