# Supplementary material for: Genomotyping of Coxiella burnetii Using Microarrays Reveals a Conserved Genomotype for Hard Tick Isolates
Source: PLOS journal article supplement (doi:10.1371/journal.pone.0025781), 2011-10-25

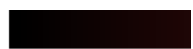

Present

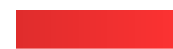

Deleted

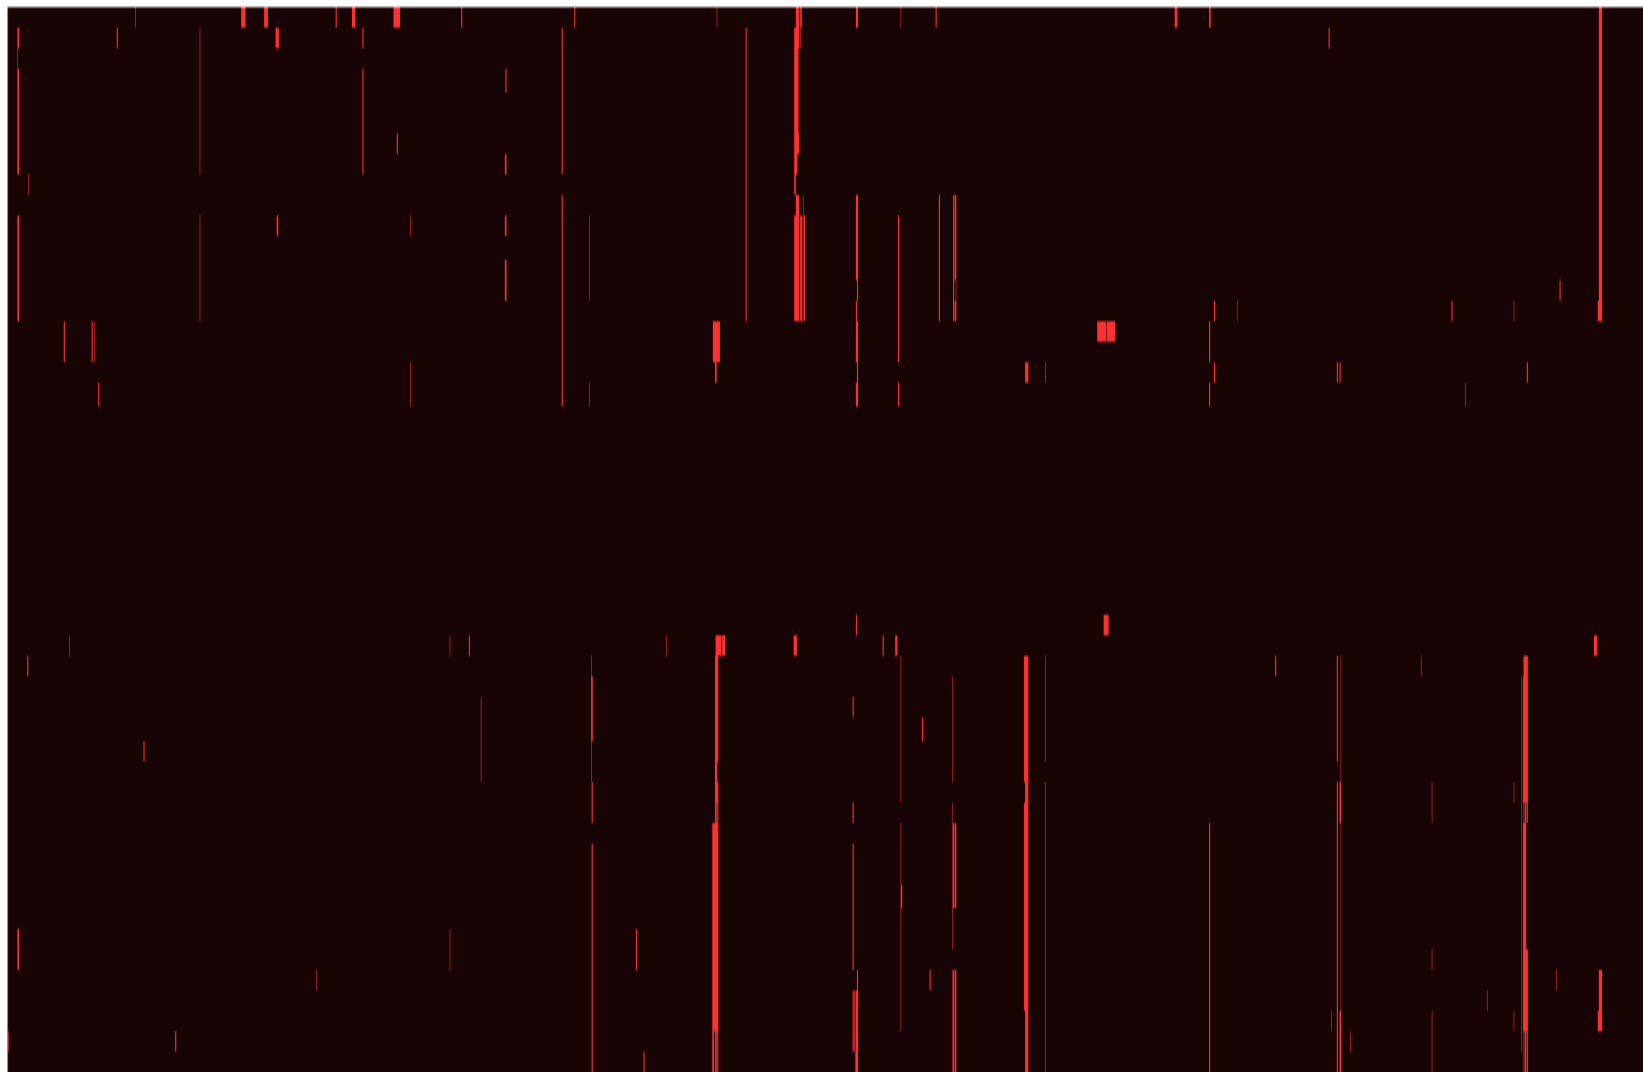

Supplement: S1 (10.1371/journal.pone.0025781.s001) [file journal.pone.0025781.s001]
